# Supplementary material for: An engineered thermal-shift screen reveals specific lipid preferences of eukaryotic and prokaryotic membrane proteins
Source: PubMed Central journal article supplement (PMC6185904; doi:10.1038/s41467-018-06702-3), 2018-10-12
Supplement: 41467_2018_6702_MOESM1_ESM.pdf [file 41467_2018_6702_MOESM1_ESM.pdf]

| Name               | SLC gene family | $T_m$ (°C)<br>Detergent-solubilized<br>membranes | $T_m$ (°C)<br>Purified fusion | $T_m$ (°C)<br>Purified fusion + lipid (*) |
|--------------------|-----------------|--------------------------------------------------|-------------------------------|-------------------------------------------|
| Bird FLVCR2        | SLC49           | 32.4 ± 0.4                                       | 22.9 ± 0.5                    | 40.2 ± 0.8 (CHS)                          |
| Human NHA2         | SLC9            | 38.8 ± 2.0                                       | 30.4 ± 0.4                    | 50.5 ± 0.3 (Brain lipids)                 |
| Mouse NHA2         | SLC9            | 40.7 ± 0.6                                       | 32.0 ± 0.8                    | 44.0 ± 0.6 (Brain lipids)                 |
| Plant CMP Sia      | SLC35           | 31.8 ± 0.3                                       | 23.2 ± 0.3                    | 30.3 ± 0.7 (CHS)                          |
| Human CMP Sia      | SLC35           | 37.1 ± 0.3                                       | 25.2 ± 0.6                    | 47.5 ± 0.5 (CHS)                          |
| Rat GLUT5          | SLC2            | 33.5 ± 0.3                                       | 23.0 ± 1.0                    | 35.6 ± 0.6 (Brain lipids)                 |
| Human GLUT 1       | SLC2            | 39.1 ± 0.3                                       | 27.2 ± 1.3                    | 58.0 ± 0.7 (Brain lipids)                 |
|                    |                 |                                                  |                               |                                           |
| AmtB               |                 | 77.9 ± 0.3                                       | 72.6 ± 4.2                    |                                           |
| ASBT <sub>NM</sub> |                 | 52.6 ± 0.4                                       | 39.8 ± 0.5                    |                                           |
| EmrD               |                 | 34.8 ± 0.7                                       | 27.9 ± 1.3                    |                                           |
| GlpG               |                 | 63.9 ± 0.5                                       | 51.3 ± 0.5                    |                                           |
| GlpT               |                 | 35.9 ± 0.7                                       | 33.5 ± 1.2                    |                                           |
| Mhp1               |                 | 41.0 ± 0.3                                       | 44.8 ± 0.4                    |                                           |
| LacY               |                 | 35.7 ± 0.3                                       | 36.7 ± 1.5                    |                                           |
| NapA               |                 | 72.1 ± 0.9                                       | 71.6 ± 0.5                    |                                           |
| NhaA               |                 | 42.6 ± 1.2                                       | 42.4 ± 0.6                    |                                           |
| XylE               |                 | 41.9 ± 0.4                                       | 40.3 ± 0.5                    |                                           |

**Supplementary Table 1.** Apparent  $T_m$  melting temperatures of prokaryotic and eukaryotic membrane proteins before and after purification as determined by GFP-TS using a range of 9 different temperatures that were fitted to a sigmoidal dose-response equation as described in Methods. Each apparent  $T_m$  (mean ± s.e.m. of the fit) is the average from two independent experiments. Apparent  $T_m$  of purified eukaryotic membrane proteins in the presence of the most stabilizing lipid is also shown; melting curves are shown in **Supplementary Fig. 5, 6, 7, 9 and 10**.

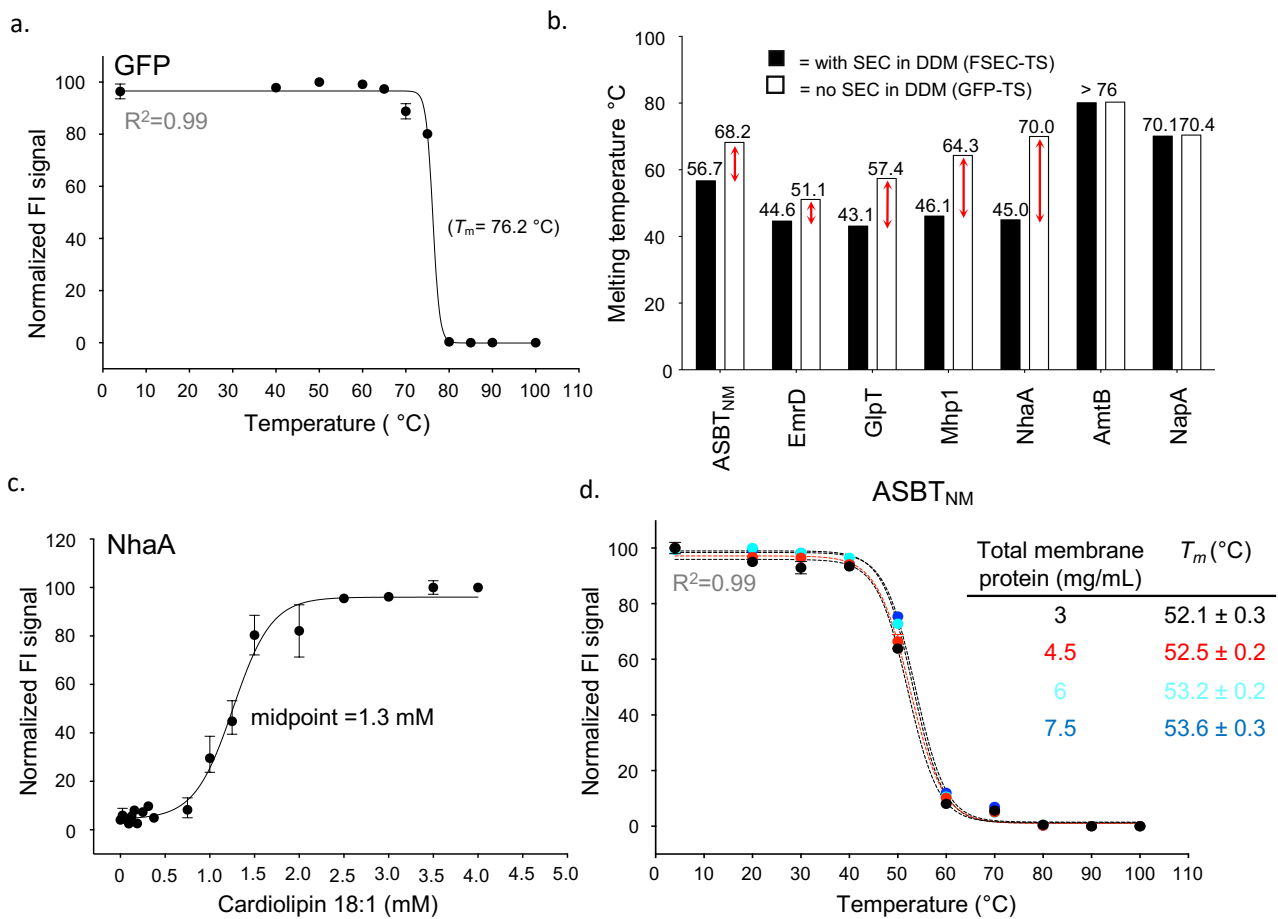

**Supplementary Fig. 1. Developing GFP-TS for high-throughput ligand screening** **a.** FSEC-TS melting curve for purified GFP; bars show the range of two technical replicates and the value reported are the mean  $\pm$  s.e.m. of the fit. **b.**  $T_m$  values obtained from the supernatant of DDM-solubilized membrane fusions remaining in solution after heating and centrifugation without  $\beta$ -OG addition (white bars) and those obtained when the same samples were later subjected to hFSEC (black bars). **c.** CL dependent stabilization of NhaA as assessed by GFP-TS.;  $n = 3$  independent titrations and the error-bars show then mean  $\pm$  s.d of the fit **d.** Apparent  $T_m$  values for 1% (w/v) DDM-solubilized ASBT<sub>NM</sub> containing membranes measured at different final total protein concentrations; bars show the range of two technical replicates, and the values reported are the mean  $\pm$  s.e.m. of the fit).

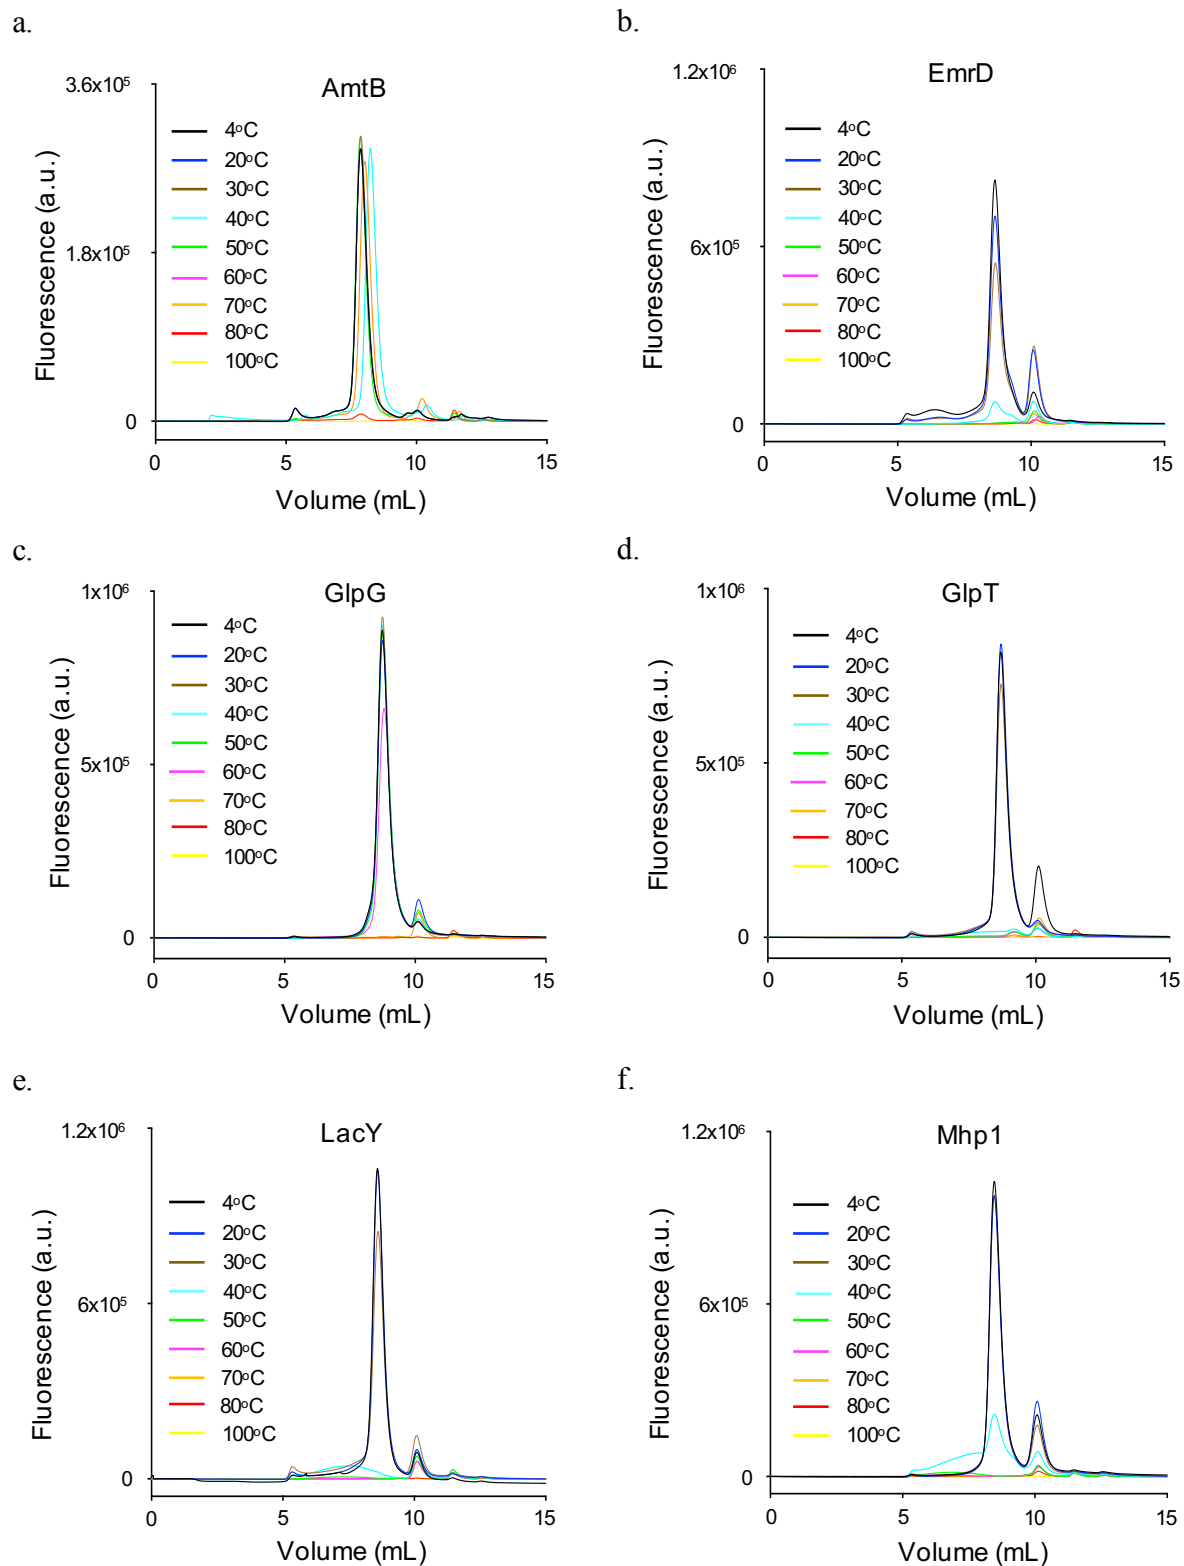

**Supplementary Fig. 2. Developing GFP-TS for high-throughput ligand screening.** FSEC-TS traces of DDM solubilized bacterial membrane protein GFP-fusions heated at different temperatures after the addition of  $\beta$ -OG as described in Methods: **a.** AmtB, **b.**, EmrD, **c.**, GlpG, **d.**, GlpT **e.**, LacY, **f.**, Mhp1.

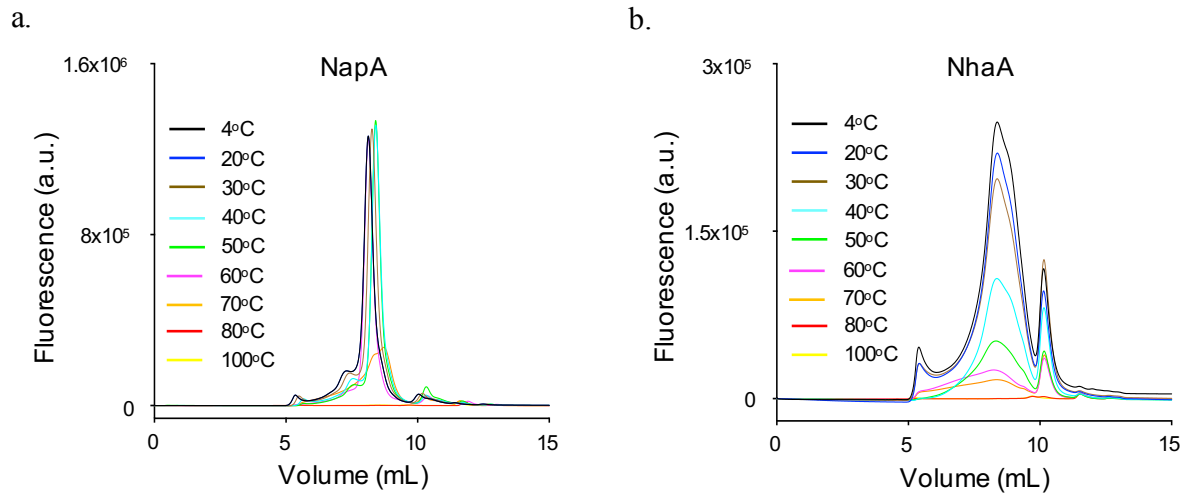

**Supplementary Fig. 3. Developing GFP-TS for high-throughput ligand screening.** FSEC-TS traces of DDM solubilized bacterial membrane protein GFP-fusions heated at different temperatures after the addition of  $\beta$ -OG as described in Methods: **a.**, NapA and **b.**, NhaA

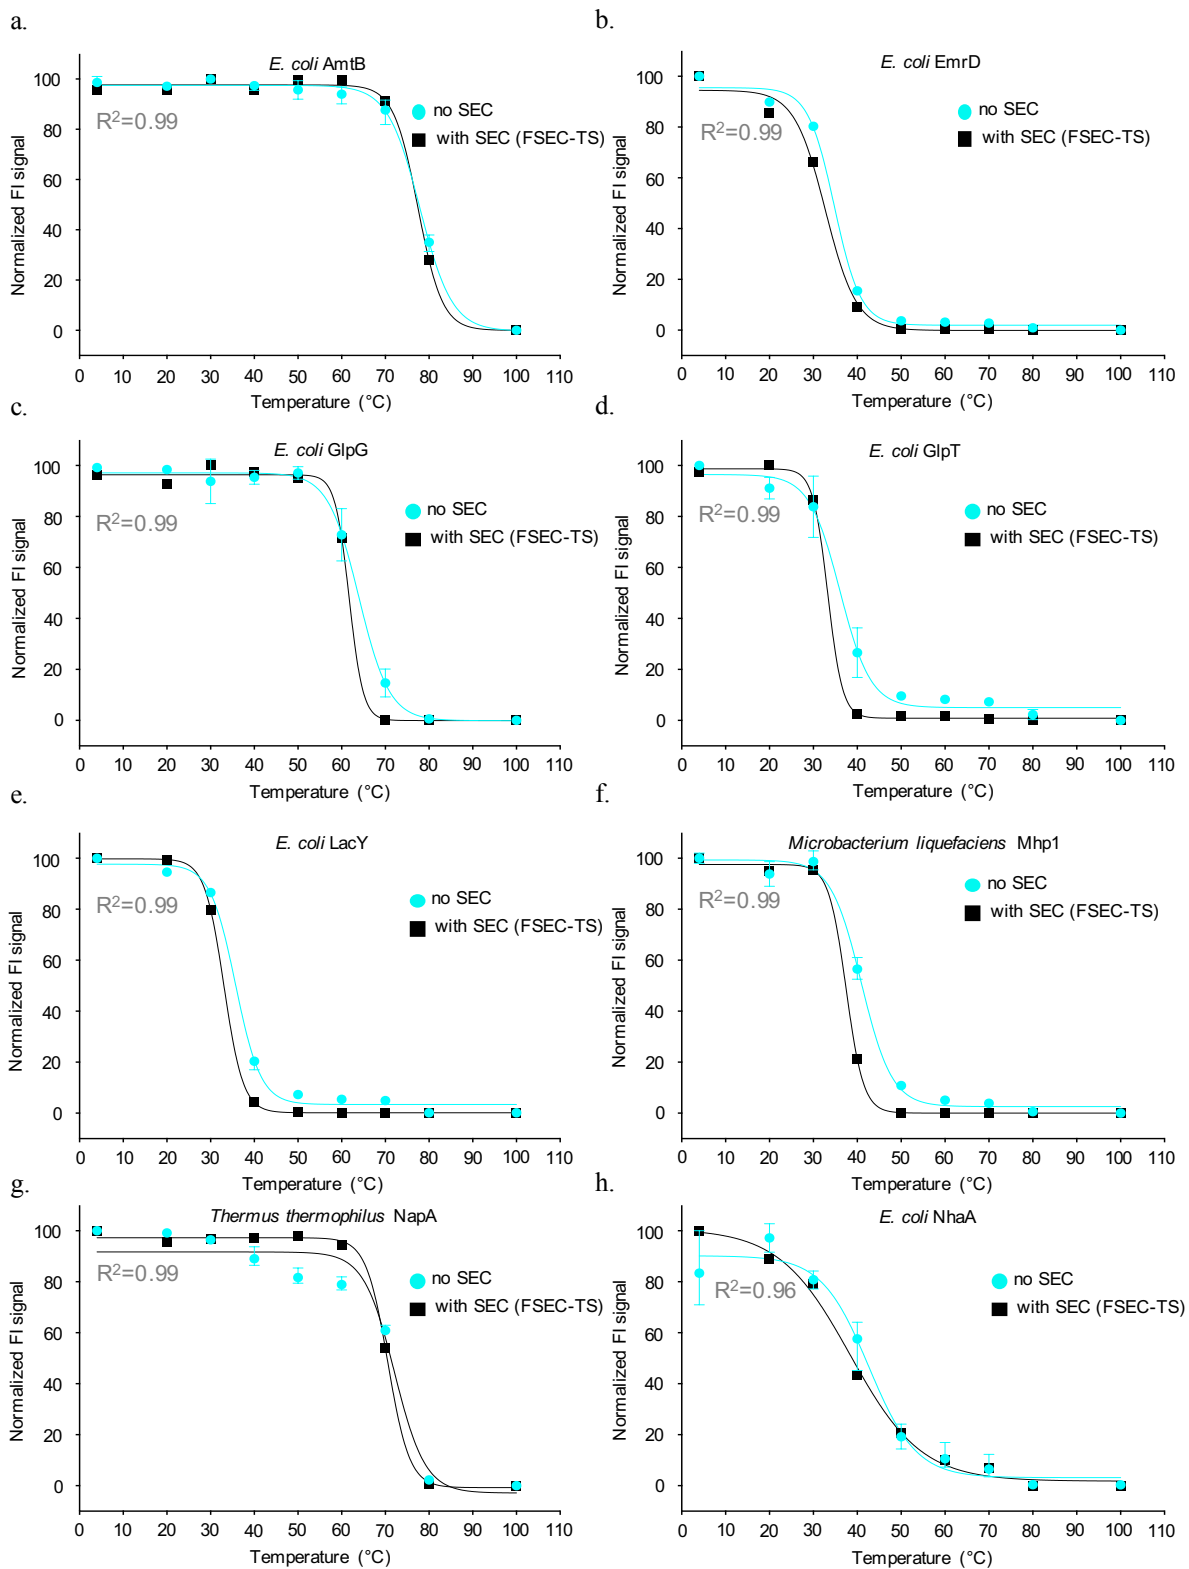

**Supplementary Fig. 4 Developing GFP-TS for high-throughput ligand screening.** Melting curves from FSEC-TS traces of bacterial membrane protein GFP-fusions shown in **Supplementary Fig. 1** (black curve) and from the fluorescence supernatant, measured on a 96-well microplate spectrofluorometer, of the DDM-solubilized fusions prior to their injection on an HPLC for FSEC analysis (cyan circles). Apparent  $T_m$  were calculated using a range of 9 different temperatures that were fitted to a sigmoidal dose-response equation as described in

Methods **a.**, AmtB **b.**, EmrD **c.**, GlpG **d.**, GlpT **e.**, LacY **f.**, Mhp1 **g.**, NapA **h.**, NhaA (error bars show the range of two technical replicates and the values reported for the apparent  $T_m$  are the mean  $\pm$  s.e.m. of the fit, which were further combined with a separate titration and are tabulated in **Table 1**).

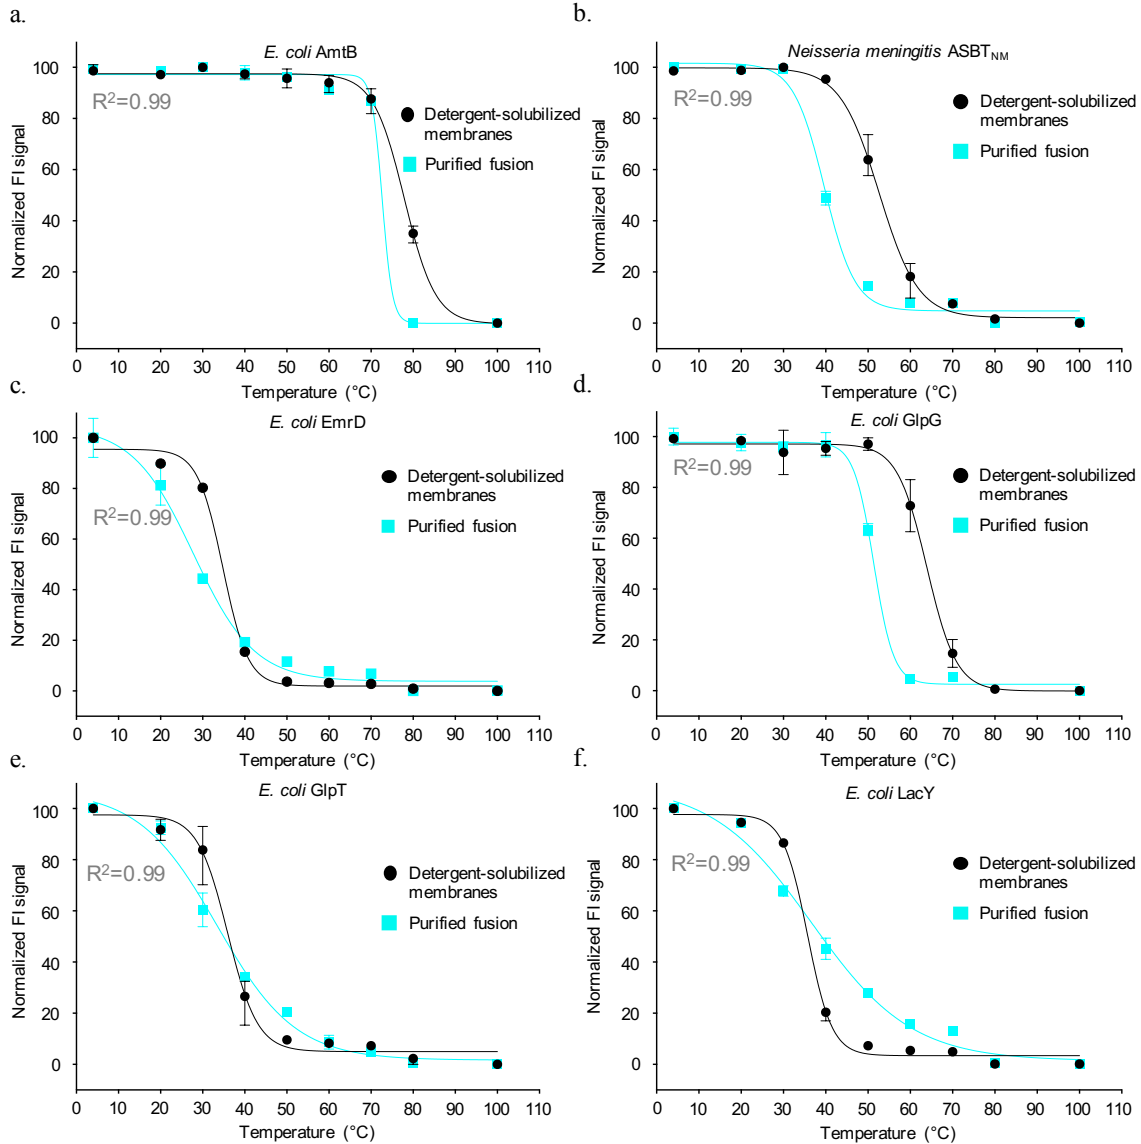

**Supplementary Fig. 5 Comparing the lipid stabilization of bacterial vs. eukaryotic membrane proteins.** Representative GFP-TS melting curves of crude-detergent solubilized membrane protein fusions (black) and those obtained after purification in DDM (cyan) as described in Methods: **a.**, AmtB **b.**, ASBT<sub>NM</sub> **c.**, EmrD **d.**, GlpG **e.**, GlpT **f.**, LacY; error bars show the range of two technical replicates and the values reported for the apparent  $T_m$  are the mean  $\pm$  s.e.m. of the fit, which were further combined with a separate titration and are tabulated in **Supplementary Table 1**.

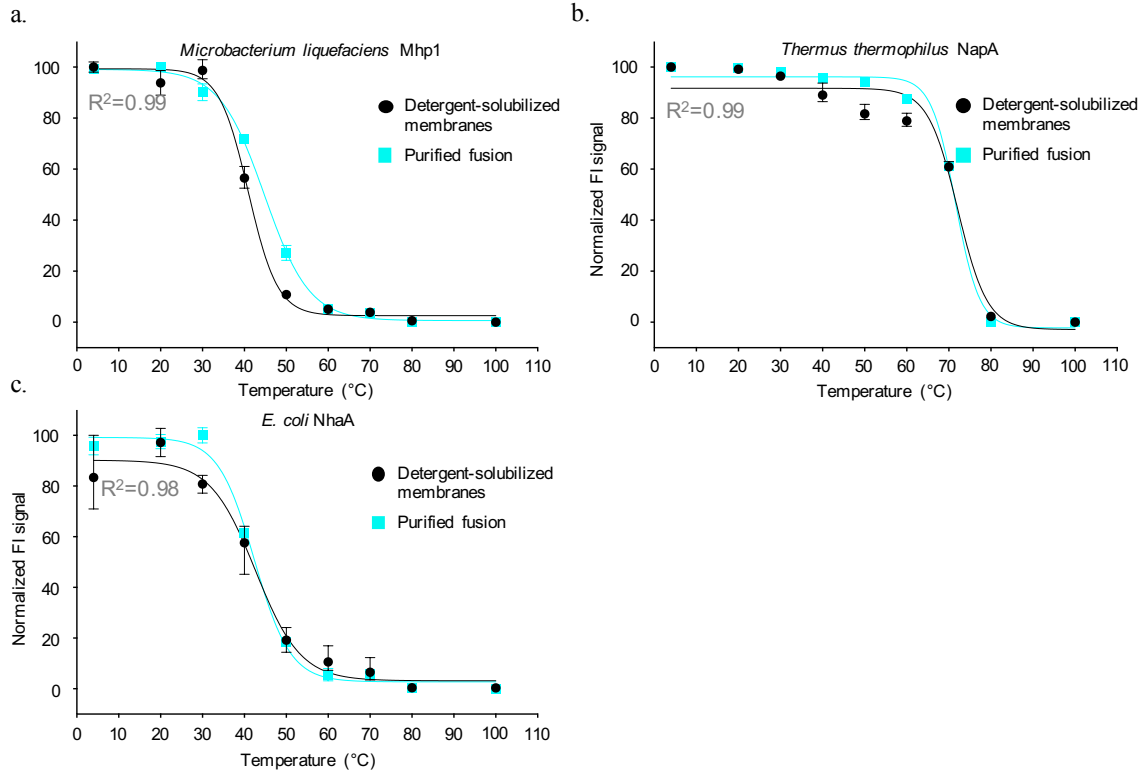

**Supplementary Fig. 6 Comparing the lipid stabilization of bacterial vs. eukaryotic membrane proteins.** Representative GFP-TS melting curves of crude-detergent solubilized membrane protein fusions (black) and those obtained after purification in DDM (cyan) as described in Methods: **a.**, Mhp1 **b.**, NapA **c.**, NhaA; error bars show the range of two technical replicates and the values reported for the apparent  $T_m$  are the mean  $\pm$  s.e.m. of the fit, which were further combined with a separate titration and are tabulated in **Supplementary Table 1**.



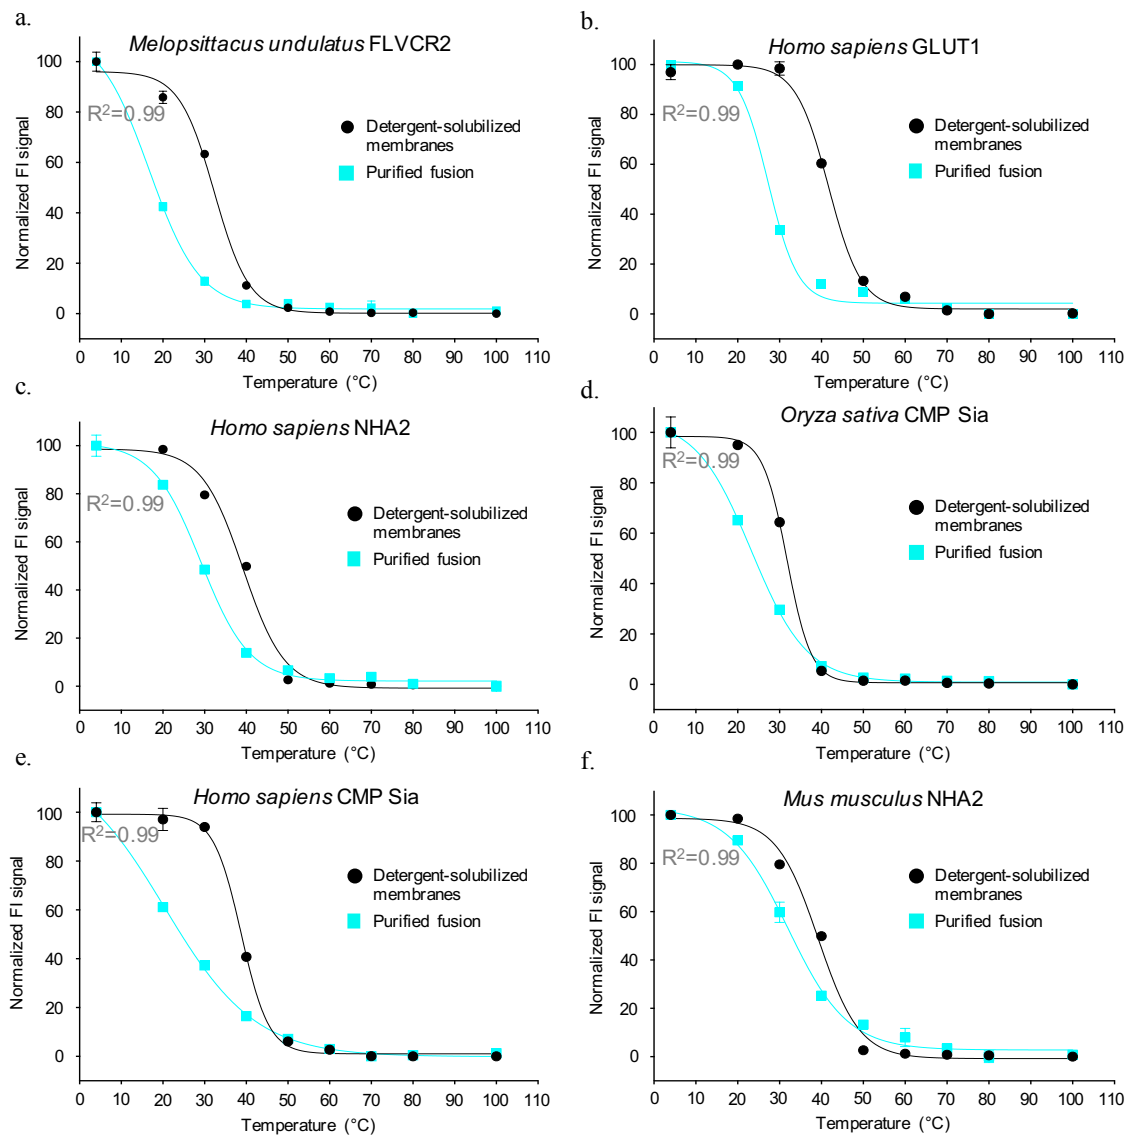

**Supplementary Fig. 7 Comparing the lipid stabilization of bacterial vs. eukaryotic membrane proteins.** Representative GFP-TS melting curves of crude-detergent solubilized membrane protein fusions (black) and those obtained after purification in DDM (cyan) as described in Methods: **a.**, bird FLVCR2 **b.**, human GLUT1 **c.**, human NHA2 **d.**, rice CMP-Sia **e.**, human CMP-Sia, and **f.**, mouse NHA2; error bars show the range of two technical replicates and the values reported for the apparent  $T_m$  are the mean  $\pm$  s.e.m. of the fit, which were further combined with a separate titration and are tabulated in **Supplementary Table 1**.

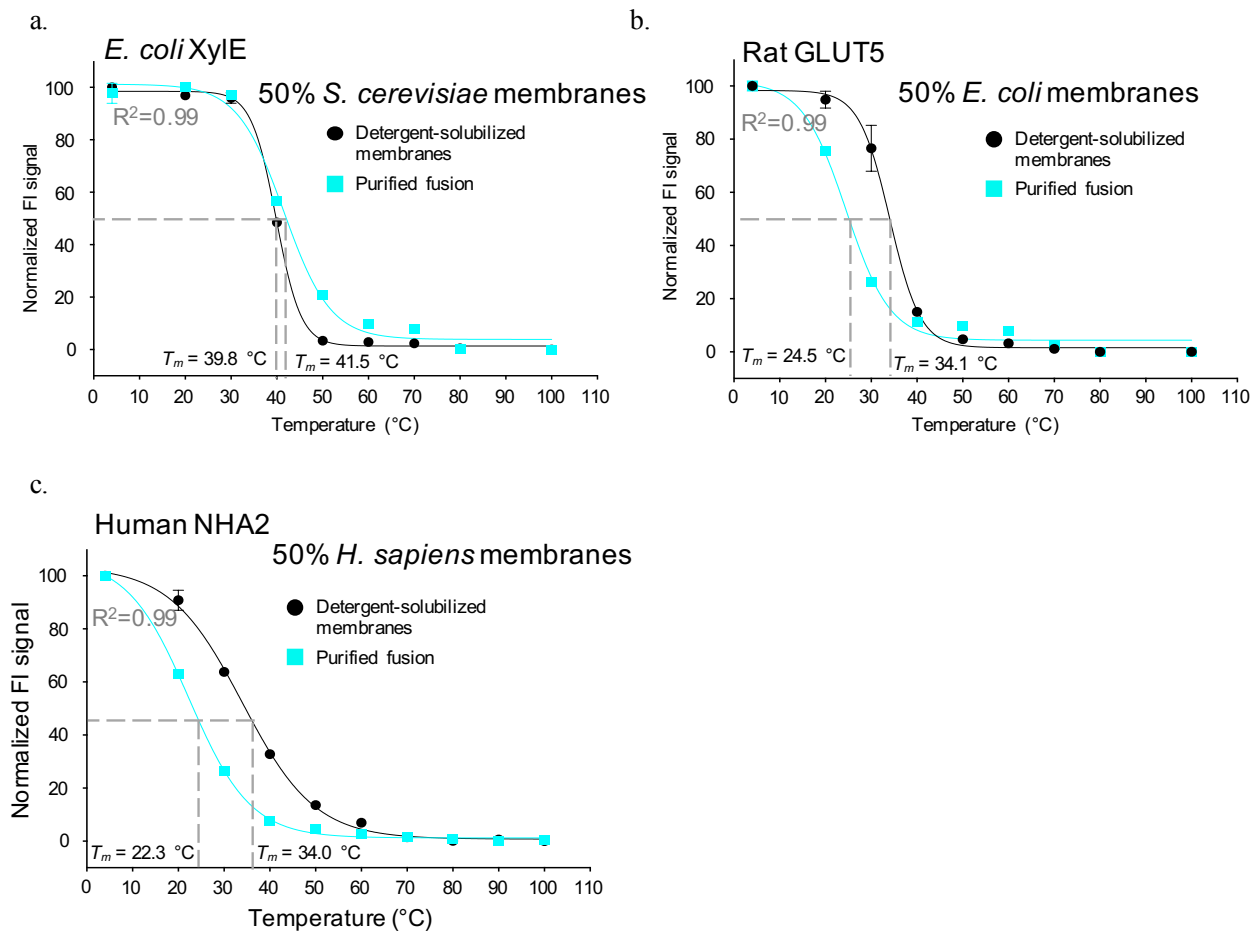

**Supplementary Fig. 8 Comparing the lipid stabilization of bacterial vs. eukaryotic membrane proteins.** Representative GFP-TS melting curves of crude-detergent solubilized membrane protein fusions (black) and those obtained after purification in DDM (cyan) as described in Methods **a.**, Xyle after equal amounts of *S. cerevisiae* detergent solubilized membranes. **b.**, rat GLUT5 after equal amounts of *E. coli* detergent solubilized membranes and **c.**, human NHA2 after equal amounts of *H. sapiens* detergent solubilized membranes; error bars show the range of two technical replicates and the values reported for the apparent  $T_m$  are the mean  $\pm$  s.e.m. of the fit and are tabulated in **Supplementary Table 1**.

*Melospittacus undulatus* FLVCR2

a.

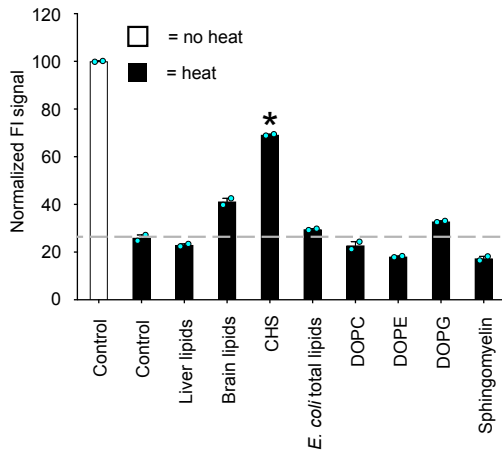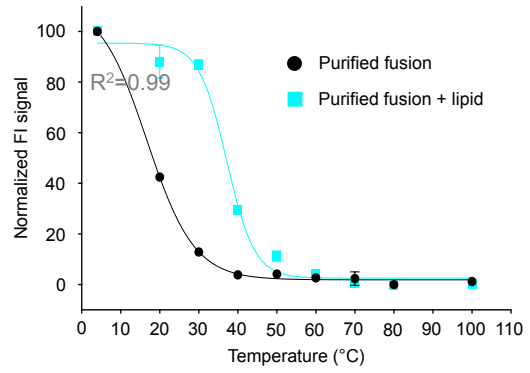

b.

*Homo sapiens* CMP Sia

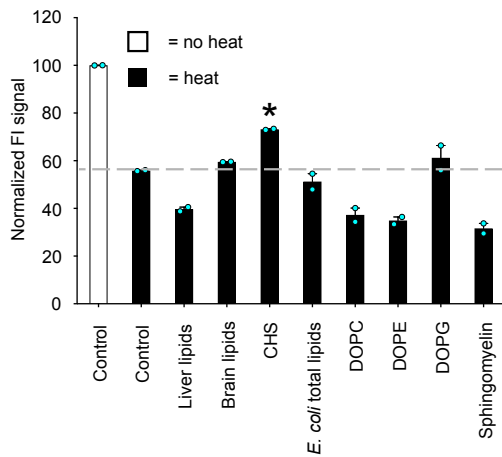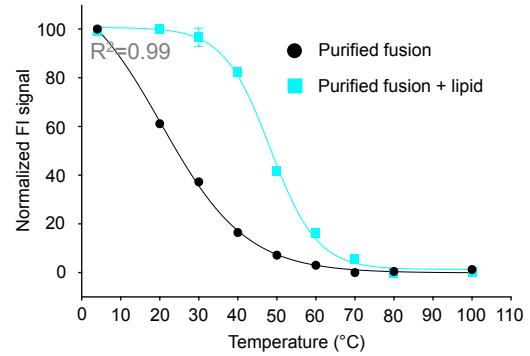

c.

*Homo sapiens* GLUT1

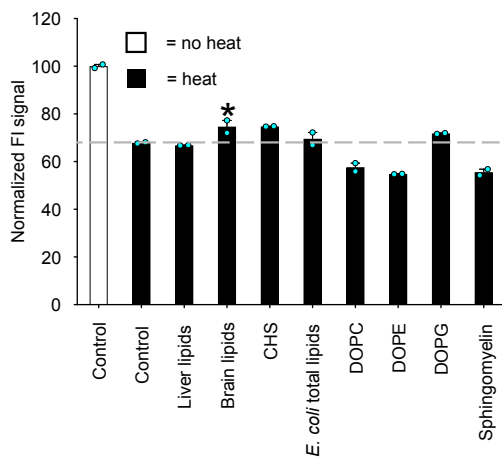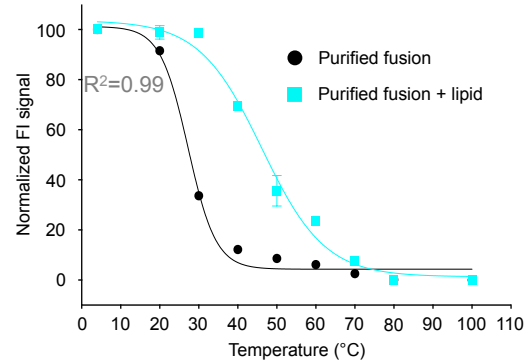

**Supplementary Fig. 9 Screening for lipid stabilization of purified eukaryotic membrane proteins using GFP-TS.** Left: Supernatant fluorescence of purified fusion before heating  $T_m + 5^\circ\text{C}$  (non-filled bars) and that remaining after heating and centrifugation (black bars) in the presence of listed lipids: **a.**, Bird FLVCR2 **b.**, Human CMP-Sia **c.**, Human GLUT1; the asterisk indicates the most stabilizing lipid (bars show the range of two technical replicates).

Right: GFP-TS melting curves for purified fusions in the absence (black) and presence of the most stabilizing lipid (cyan) as identified by screen; error bars show the range of two technical replicates and the values reported for the apparent  $T_m$  are the mean  $\pm$  s.e.m. of the fit and are tabulated in **Supplementary Table 1**.

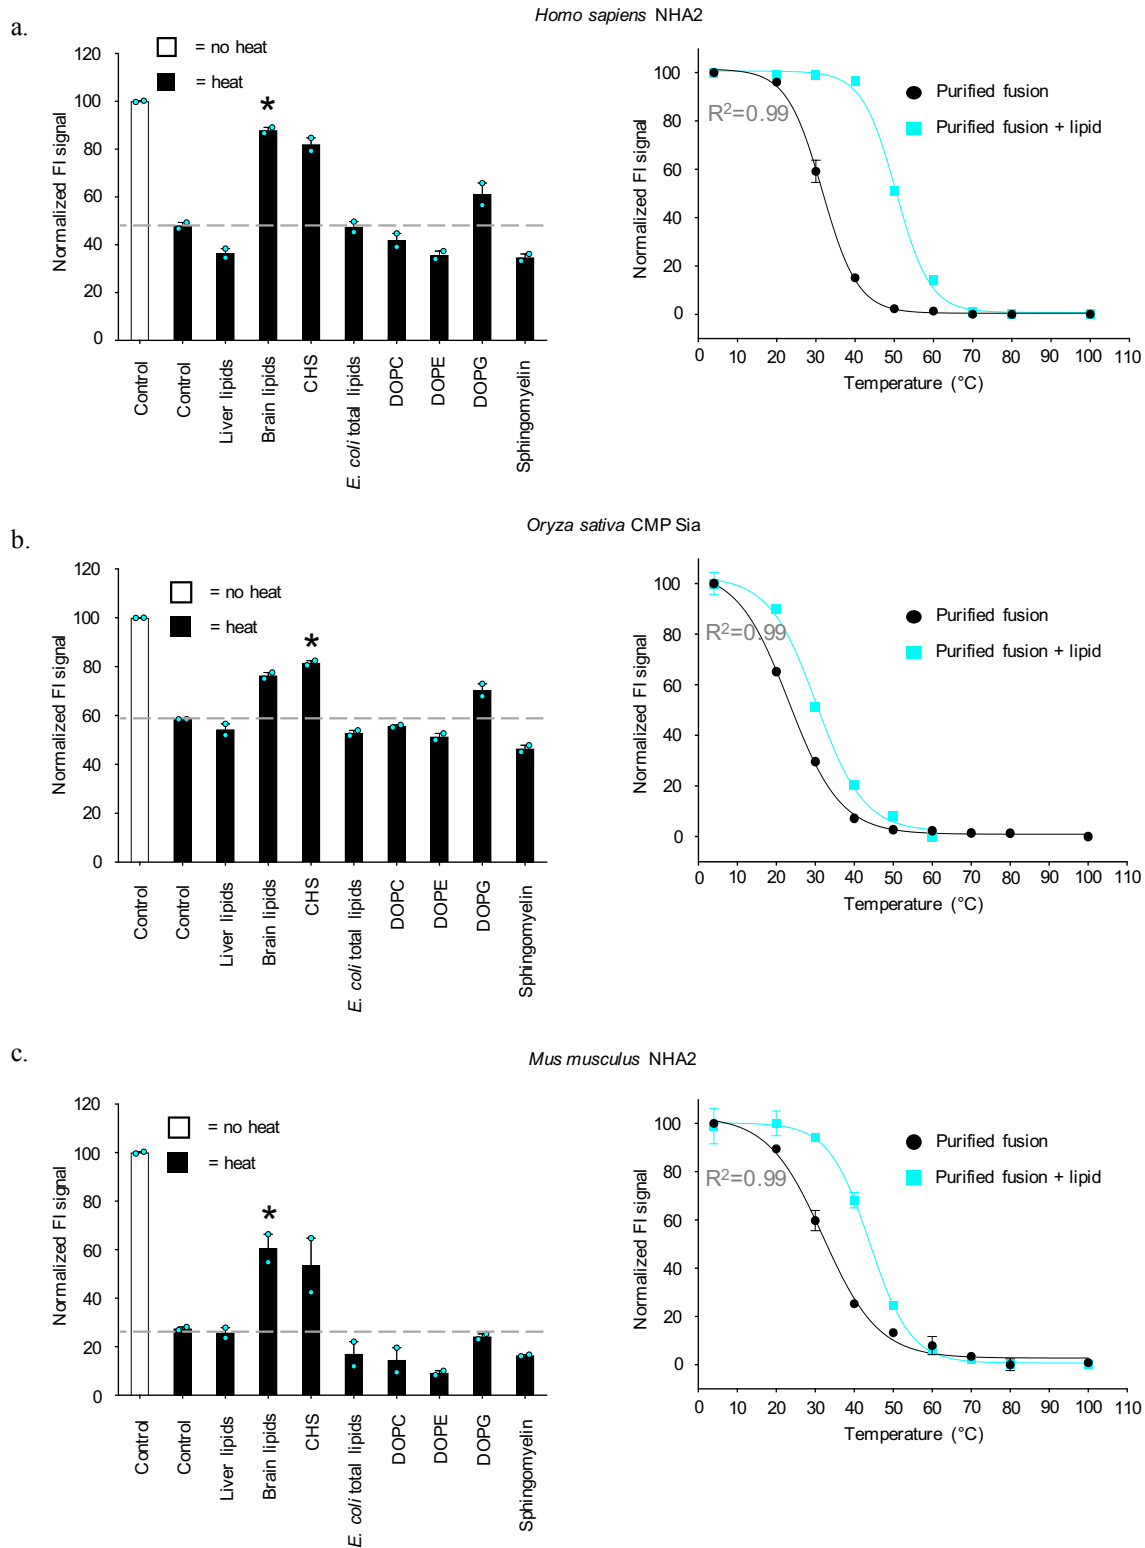

**Supplementary Fig. 10 Screening for lipid stabilization of purified eukaryotic membrane proteins using GFP-TS.** Left: Supernatant fluorescence of purified fusion before heating  $T_m + 5^\circ\text{C}$  (non-filled bars) and that remaining after heating and centrifugation (black

bars) in the presence of listed lipids: **a.**, Human NHA2 **b.**, Plant CMP-Sia and **c.**, Mouse NHA2; the asterisk indicates the most stabilizing lipid (bars show the range of two technical replicates. Right: GFP-TS melting curves for purified fusions in the absence (black) and presence of the most stabilizing lipid (cyan) as identified by screen; error bars show the range of two technical replicates and the values reported for the apparent  $T_m$  are the mean  $\pm$  s.e.m. of the fit and are tabulated in **Supplementary Table 1**.

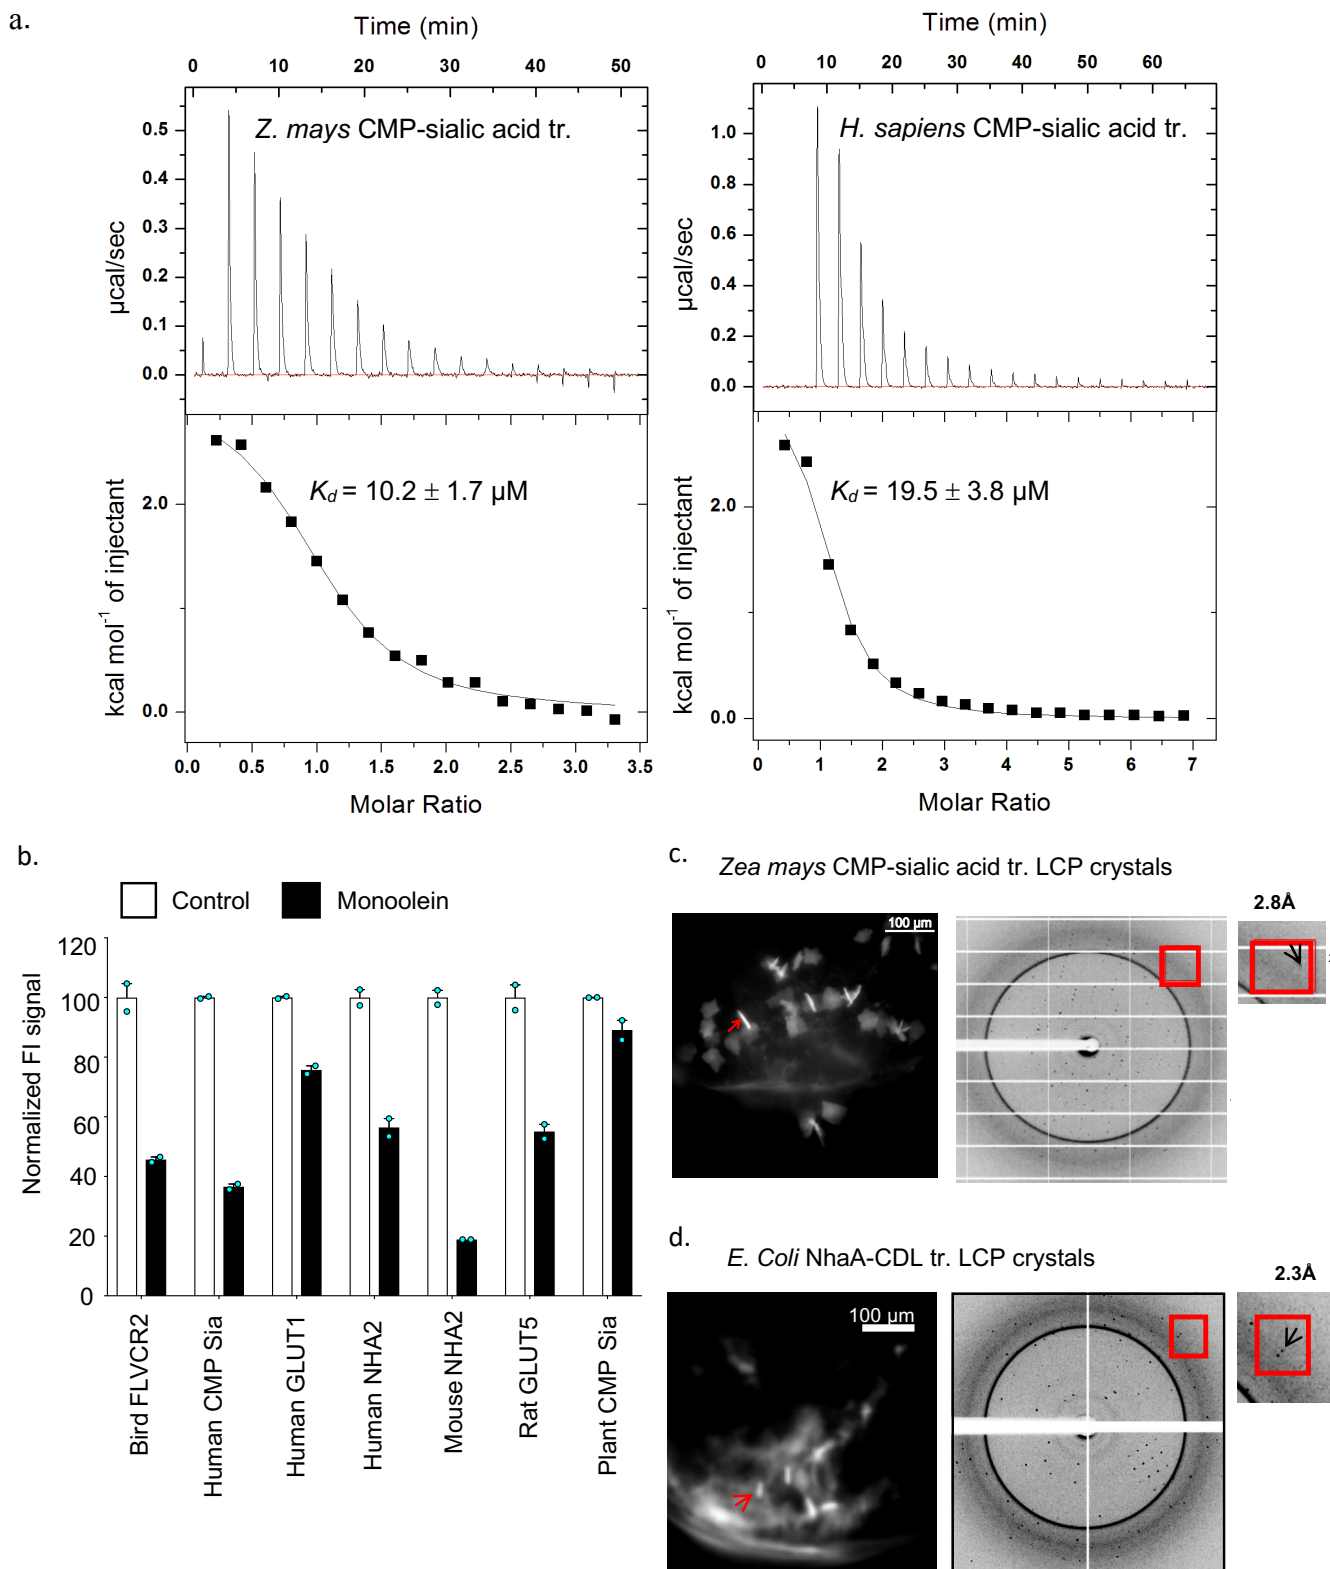

**Supplementary Fig. 11. Using GFP-TS for functional and structural characterization of membrane proteins.** a. Representative ITC thermogram obtained by successive addition of CMP to purified putative plant CMP-sialic acid transporter (left) and human CMP-sialic acid

transporter (right) (see Methods). Integrated heats with baseline-subtracted (red line) inverted power data are shown in top panels. Fit to a single binding site mechanism with a fixed 1:1 stoichiometry is shown in bottom panels (black line).  $K_d$  values are reported as the mean  $\pm$  s.e.m. of the fit. **b.** Supernatant fluorescence of purified fusion before heating  $T_m + 5^\circ\text{C}$  (non-filled bars) and that remaining after heating and centrifugation (black bars) in the presence of monolein (error bars show the range of two technical replicates). **c.** Lipidic cubic phase crystals of NhaA shown under a UV-microscope that were obtained in monolein when 2 % (w/v) cardiolipin 18:1 was added during the final stages of purification prior to crystallization (left) and X-ray diffraction image of an LCP crystal of NhaA (right). **d.** as in c. for LCP crystals of *Zea mays* CMP-sialic acid transporter when CMP was added prior to crystallization (left) and X-ray diffraction image (right).
